# Supplementary material
Source: Elsevier journal article supplement (https://www.sciencedirect.com/science/article/pii/S1413867021001719)
Supplement: mmc3 [file S1413867021001719:mmc3.docx]

**Supplementary Table 2**

|  | **Death** | | |  | **Intubation or Death** | | |
| --- | --- | --- | --- | --- | --- | --- | --- |
|  | **OR** | **p** | **(95% IC)** |  | **OR** | **p** | **(95% IC)** |
| **Treatment** |  |  |  |  |  |  |  |
| Tocilizumab | 1 |  |  |  | 1 |  |  |
| Corticosteroids | 2.03 | 0.10 | (0.87 - 4.71) |  | 2.54 | 0.04 | (1.04 - 6.16) |
| Tocilizumab and Corticosteroids | 3.08 | 0.20 | (0.54 - 17.39) |  | 1.78 | 0.54 | (0.29 – 11.18) |
| **Pre-exhisting conditions** |  |  |  |  |  |  |  |
| **Sex** |  |  |  |  |  |  |  |
| M | 1 |  |  |  | 1 |  |  |
| F | 0.69 | 0.37 | (0.3 - 1.55) |  | 0.99 | 0.98 | (0.48 - 2.04) |
| **Age** | 1.10 | 0.00 | (1.06 - 1.15) |  | 1.08 | 0.00 | (1.04 - 1.16) |
| **Ischemic heart disease** |  |  |  |  |  |  |  |
| No | 1 |  |  |  |  |  |  |
| Yes | 2.81 | 1.69 | (0.87 - 9.14) |  |  |  |  |
| Missing | 0.42 | 0.27 | (0.12 - 1.5) |  |  |  |  |
| **Obesity** |  |  |  |  |  |  |  |
| No | 1 |  |  |  | 1 |  |  |
| Yes | 2.12 | 0.10 | (0.86 - 5.21) |  | 1.87 | 0.12 | (0.85 - 4.09) |
| Missing | 0.94 | 0.89 | (0.39 - 2.26) |  | 0.58 | 0.34 | (0.20 - 1.76) |
| **Cardiac arrhythmia** |  |  |  |  |  |  |  |
| No |  |  |  |  | 1 |  |  |
| Yes |  |  |  |  | 2.20 | 0.20 | (0.66 - 7.34) |
| Missing |  |  |  |  | 0.44 | 0.21 | (0.12 - 1.59) |
| **Myalgia/asthenia** |  |  |  |  |  |  |  |
| No |  |  |  |  | 1 |  |  |
| Yes |  |  |  |  | 0.63 | 0.27 | (0.28 - 1.45) |
| Missing |  |  |  |  | 0.86 | 0.86 | (0.16 - 4.51) |
| **Anticoagulants at home** |  |  |  |  |  |  |  |
| No |  |  |  |  | 1 |  |  |
| Yes |  |  |  |  | 1.20 | 0.81 | (0.27 - 5.22) |
| Missing |  |  |  |  | 1.70 | 0.19 | (0.76 - 3.83) |
| **Disease related conditions** |  |  |  |  |  |  |  |
| **Time between symptom onset and treatment** | 0.97 | 0.43 | (0.91 - 1.04) |  | 0.96 | 0.25 | (0.89 - 1.03) |
| **Lung involvement** |  |  |  |  |  |  |  |
| <20% | 1 |  |  |  | 1 |  |  |
| 20-40% | 0.33 | 0.05 | (0.1 - 1.02) |  | 0.38 | 0.06 | (0. 142 - 1.03) |
| 40-60% | 0.76 | 0.59 | (0.28 - 2.08) |  | 0.51 | 0.16 | (0.20 - 1.30) |
| >60% | 0.99 | 0.98 | (0.33 - 2.94) |  | 0.63 | 0.36 | (0.23 - 1.71) |
| Missing | 1.62 | 0.70 | (0.14 - 19.47) |  | 1.01 | 1.99 | (0.09 - 11.52) |
| **Maximum body temparature (increase per 1 C°)** | 1.47 | 0.07 | (0.97 - 2.24) |  | 1.44 | 0.07 | (0.97 - 2.12) |
| **spO2** | 0.94 | 0.03 | (0.89 - 0.99) |  |  |  |  |
| **CRP** | 1.02 | 0.30 | (0.98 - 1.07) |  |  |  |  |
| **LDH** |  |  |  |  |  |  |  |
| <465 | 1 |  |  |  | 1 |  |  |
| 465-586 | 1.32 | 0.62 | (0.44 - 3.99) |  | 0.79 | 0.66 | (0.28 - 2.21) |
| 586-739 | 4.47 | 0.01 | (1.48 - 13.47) |  | 4.09 | 0.01 | (1.54 - 10.87) |
| >739 | 4.47 | 0.01 | (1.49 - 13.4) |  | 3.23 | 0.02 | (1.18 - 8.83) |
| **Respiratory Frequency** |  |  |  |  | 1.10 | 0.00 | (1.03 - 1.16) |
| **Propensity score** | 0.99 | 0.66 | (0.96 - 1.03) |  | 0.99 | 0.66 | (0.96 - 1.03) |

Model are also adjusted for calendar time.
